# Supplementary material
Source: MDPI journal article supplement (https://www.mdpi.com/2071-1050/11/19/5256)
Supplement: s1 [file s1]

|                         |  |                                      |                  |
|-------------------------|--|--------------------------------------|------------------|
| Date of Interview       |  | Gender                               | Male      Female |
| Name of Village/Mohalla |  | Local Time of interview              |                  |
| Name of Thana           |  | Respondent's Phone Number            |                  |
| Respondent's Name       |  | Respondent's ID (no need to fill up) |                  |

## Part A

Instructions to participants: For each of the following statements and/or questions, please circle the point on the scale that you feel is most appropriate in describing you.

1. In general, I consider myself:

|                         |   |   |   |   |                     |   |
|-------------------------|---|---|---|---|---------------------|---|
| 1                       | 2 | 3 | 4 | 5 | 6                   | 7 |
| Not a very happy person |   |   |   |   | A very happy person |   |

2. Compared to most of my peers, I consider myself:

[illegible]

3. Some people are generally very happy. They enjoy life regardless of what is going on, getting the most out of everything. To what extent does this characterization describe you?

[illegible]

4. Some people are generally not very happy. Although they are not depressed, they never seem as happy as they might be. To what extent does this characterization describe you?

[illegible]

## Part B

In this task we ask you to imagine that you have been randomly paired with another person, whom we will refer to simply as the “other.” This other person is someone you do not know at this moment and you will never know in the future. Both you and the “other” person will be making choices by circling either the letter A, B, or C. Your own choices will produce points for both yourself and the “other” person. Likewise, the other’s choice will produce points for him/her and for you. Every point has value: the more points you receive, the better for you, and the more points the “other” receives, the better for him/her.

Here's an example of how this task works:

|            | A   | B   | C   |
|------------|-----|-----|-----|
| You get    | 500 | 500 | 550 |
| Other gets | 100 | 500 | 330 |

In this example, if you choose A you would receive 500 points and the other would receive 100 points; if you chose B, you would receive 500 points and the other 500; and if you chose C, you would receive 550 points and the other 330. So, you see that your choice influences both the number of points you receive and the number of points the other receives. Before you begin making choices, please keep in mind that there are no right or wrong answers—choose the option that you, for whatever reason, prefer most. Also, remember that the points have

value: the more of them you accumulate the better it is for you. Likewise, from the “other’s” point of view, the more points s/he accumulates, the better it is for him/her.

After playing this game, your choice will be randomly paired with another respondent’s choice in our experiment (so that you will never know who you pair is). Both you and your pair will be paid by a certain amount of money based on the point you get and your pair gets. The more point you get; the more money you will earn.

(For calculating the actual payment, a predetermined exchange rate will be applied. From this game, you can earn at maximum BDT 150)

For each of the nine choice situations, circle A, B, or C, depending on which column you prefer most:

|    |            | A   | B   | C   |    |            | A   | B   | C   |
|----|------------|-----|-----|-----|----|------------|-----|-----|-----|
| 1. | You get    | 480 | 540 | 480 | 6. | You get    | 500 | 500 | 570 |
|    | Other gets | 80  | 280 | 480 |    | Other gets | 500 | 100 | 300 |
| 2. | You get    | 560 | 500 | 500 | 7. | You get    | 510 | 560 | 510 |
|    | Other gets | 300 | 500 | 100 |    | Other gets | 510 | 300 | 110 |
| 3. | You get    | 520 | 520 | 580 | 8. | You get    | 550 | 500 | 500 |
|    | Other gets | 520 | 120 | 320 |    | Other gets | 300 | 100 | 500 |
| 4. | You get    | 500 | 560 | 490 | 9. | You get    | 480 | 490 | 540 |
|    | Other gets | 100 | 300 | 490 |    | Other gets | 100 | 490 | 300 |
| 5. | You get    | 560 | 500 | 490 |    |            |     |     |     |
|    | Other gets | 300 | 500 | 90  |    |            |     |     |     |

## Part C

### For each behavior stated below,

Choose "0" in the right hand box if you have not performed the behavior during the past two months.

Choose "1" in the right hand box if you have performed the behavior one time during the past two months.

Choose "2" in the right hand box if you have performed the behavior more than once during the past two months.

|                                                                                                                                                 |   |   |   |
|-------------------------------------------------------------------------------------------------------------------------------------------------|---|---|---|
| 1. Taught somebody a skill.                                                                                                                     | 0 | 1 | 2 |
| 2. Served as a role model for a young person.                                                                                                   | 0 | 1 | 2 |
| 3. Won an award or contest.                                                                                                                     | 0 | 1 | 2 |
| 4. Went to see a movie or play.                                                                                                                 | 0 | 1 | 2 |
| 5. Gave money to a charity.                                                                                                                     | 0 | 1 | 2 |
| 6. Did volunteer work for a charity.                                                                                                            | 0 | 1 | 2 |
| 7. Listened to a person tell me his or her personal problems.                                                                                   | 0 | 1 | 2 |
| 8. Purchased a new car or major appliance (e.g., dishwasher, television set)                                                                    | 0 | 1 | 2 |
| 9. Taught Sunday School or provided similar religious instruction.                                                                              | 0 | 1 | 2 |
| 10. Taught somebody about right and wrong, good and bad.                                                                                        | 0 | 1 | 2 |
| 11. Told somebody about my own childhood.                                                                                                       | 0 | 1 | 2 |
| 12. Read a story to a child.                                                                                                                    | 0 | 1 | 2 |
| 13. Babysat for somebody else's children.                                                                                                       | 0 | 1 | 2 |
| 14. Participated in an athletic sport.                                                                                                          | 0 | 1 | 2 |
| 15. Gave clothing or personal belongings to a not-for-profit organization (such as the "Good Will," "Salvation Army," etc.).                    | 0 | 1 | 2 |
| 16. Was elected or promoted to a leadership position.                                                                                           | 0 | 1 | 2 |
| 17. Made a decision that influenced many people.                                                                                                | 0 | 1 | 2 |
| 18. Ate dinner at a restaurant.                                                                                                                 | 0 | 1 | 2 |
| 19. Produced a piece of art or craft (such as pottery, quilt, woodwork, painting, etc.).                                                        | 0 | 1 | 2 |
| 20. Produced a plan for an organization or group outside my own family.                                                                         | 0 | 1 | 2 |
| 21. Visited a nonrelative in a hospital or nursing home.                                                                                        | 0 | 1 | 2 |
| 22. Read a novel.                                                                                                                               | 0 | 1 | 2 |
| 23. Made something for somebody and then gave it to them.                                                                                       | 0 | 1 | 2 |
| 24. Drew upon my past experiences to help a person adjust to a situation.                                                                       | 0 | 1 | 2 |
| 25. Picked up garbage or trash off the street or some other area that is not my property.                                                       | 0 | 1 | 2 |
| 26. Gave a stranger direction on how to get somewhere.                                                                                          | 0 | 1 | 2 |
| 27. Attended a community or neighborhood meeting.                                                                                               | 0 | 1 | 2 |
| 28. Wrote a poem or story.                                                                                                                      | 0 | 1 | 2 |
| 29. Took in a pet.                                                                                                                              | 0 | 1 | 2 |
| 30. Did something that other people considered to be unique and important.                                                                      | 0 | 1 | 2 |
| 31. Attended a meeting or activity at a church ( <u>not</u> including conventional worship service such as Mass, Sunday morning service, etc.). | 0 | 1 | 2 |
| 32. Offered physical help to a friend or acquaintance (e.g., helped them move, fix a car, etc.).                                                | 0 | 1 | 2 |
| 33. Had an argument with a friend or family member.                                                                                             | 0 | 1 | 2 |
| 34. Contributed time or money to a political or social cause.                                                                                   | 0 | 1 | 2 |

|                                                                                       |   |   |   |
|---------------------------------------------------------------------------------------|---|---|---|
| 35. Planted or tended a garden, tree, flower, or other plant.                         | 0 | 1 | 2 |
| 36. Wrote a letter to a newspaper, magazine, Congressman, etc. about a social issue.  | 0 | 1 | 2 |
| 37. Cooked a meal for friends (nonfamily members).                                    | 0 | 1 | 2 |
| 38. Donated blood.                                                                    | 0 | 1 | 2 |
| 39. Took prescription medicine.                                                       | 0 | 1 | 2 |
| 40. Sewed or mended a garment or other object.                                        | 0 | 1 | 2 |
| 41. Restored or rehabbed a house, part of a house, a piece of furniture, etc.         | 0 | 1 | 2 |
| 42. Assembled or repaired a child's toy.                                              | 0 | 1 | 2 |
| 43. Voted for a political candidate or some other elected position.                   | 0 | 1 | 2 |
| 44. Invented something.                                                               | 0 | 1 | 2 |
| 45. Provided first aid or other medical attention.                                    | 0 | 1 | 2 |
| 46. Attended a party.                                                                 | 0 | 1 | 2 |
| 47. Took an afternoon nap.                                                            | 0 | 1 | 2 |
| 48. Participated in or attended a benefit or fund-raiser.                             | 0 | 1 | 2 |
| 49. Learned a new skill (e.g., computer language, musical instrument, welding, etc.). | 0 | 1 | 2 |
| 50. Became a parent (had a child, adopted a child, or became a foster parent).        | 0 | 1 | 2 |

## Part D

|   |                                                                    |                                                                                                                                                                                    |
|---|--------------------------------------------------------------------|------------------------------------------------------------------------------------------------------------------------------------------------------------------------------------|
| 1 | Age                                                                | 14 to 30 (0)<br>31 to 39 (1)<br>40 to 49 (2)<br>50 to 59 (3)<br>60 to 69 (4)<br>70 or more (5)                                                                                     |
| 2 | Education Level                                                    | Illiterate (0)<br>Primary education (1)<br>Secondary school degree (2)<br>College degree (3)<br>University degree (4)<br>Graduate University degree (5)<br>PhD (6)<br>Others : (7) |
| 3 | Individual's Monthly Income                                        | Please specify.....                                                                                                                                                                |
| 4 | Household's Monthly Income                                         | Please specify.....                                                                                                                                                                |
| 5 | House Ownership                                                    | Own (0)<br>Rental (1)                                                                                                                                                              |
| 6 | House Condition (total area of your shelter if the house is owned) | Please specify:                                                                                                                                                                    |
| 7 | Family Structure                                                   | Single family (0)<br>Joint family (1)                                                                                                                                              |
| 8 | Land ownership                                                     | Yes (Amount of land.....Khata/decimal/gonda/bigha/acre)<br>No                                                                                                                      |
| 9 | Residing Time in your recent place (Year)                          | Less than one year<br>1 to 3 (0)<br>4 to 10 (1)<br>11 to 20 (2)<br>21 to 30 (3)<br>31 to 40 (4)<br>41 to 50 (5)                                                                    |

|    |                                                                     |                                                |
|----|---------------------------------------------------------------------|------------------------------------------------|
|    |                                                                     | 51 to 80 (6)<br>More than 80 years (7)         |
| 10 | Residence Status                                                    | Local (0)<br>Migrant (1)                       |
| 11 | Number of Household Members                                         | .....                                          |
| 12 | Number of siblings                                                  |                                                |
| 13 | Position among the siblings                                         |                                                |
| 14 | Number of brothers, and sister                                      | Brothers =                      Sisters =      |
| 15 | Number of Family Members Aged Less than 12 Years                    | .....                                          |
| 16 | Number of Family Members Aged more than 65 Years<br>reside with you | .....                                          |
| 17 | Marital status                                                      | Married (0)                      Unmarried (1) |
